# Supplementary material for: Post-modified anionic nano-porous metal–organic framework as a novel catalyst for solvent-free Michael addition reactions
Source: Royal Society of Chemistry journal article supplement (doi:10.1039/c4ra05226a), 2014-08-22
Supplement: c4ra05226a1.pdf [file c4ra05226a1.pdf]

**Electronic Supplementary Information**

**Post-modified anionic nano-porous metal-organic framework  
as novel catalyst for solvent-free Michael addition reactions**

**Saeideh Beheshti and Ali Morsali\***

Department of Chemistry, Faculty of Sciences, Tarbiat Modares University, P.O. Box  
14115-175, Tehran, Islamic Republic of Iran.

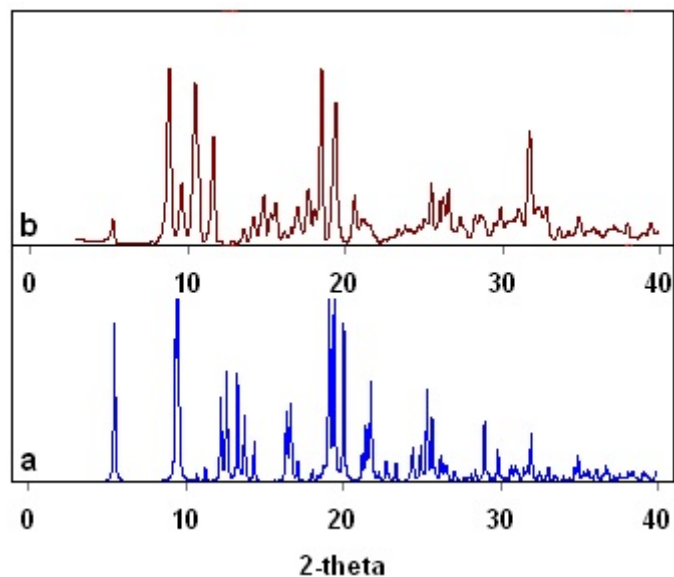

**Figure S1.** The XRD patterns of (a) simulated from single crystal X-ray data of compound **1** and (b) colorless crystals of compound **1** prepared in the presence of terephthalodinitrile.

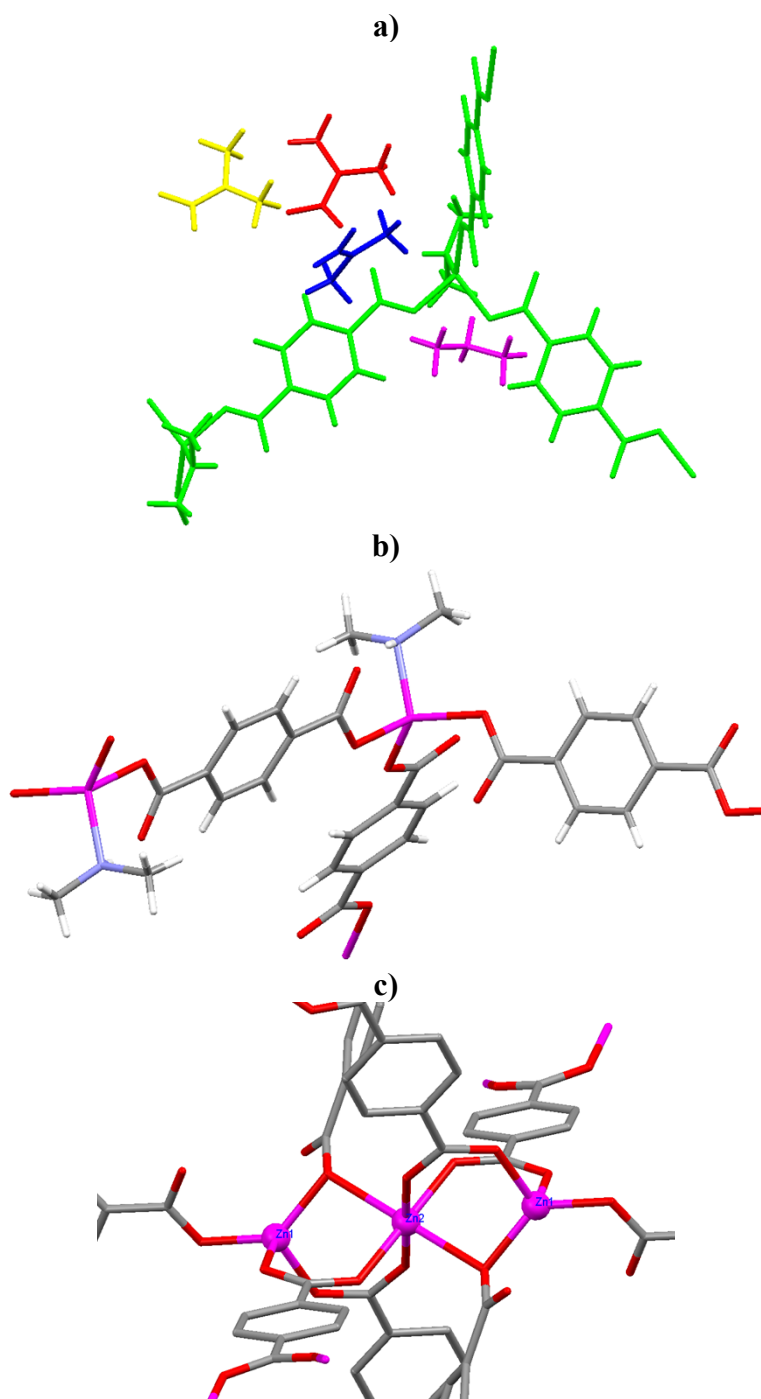

**Figure S2.** Showing the a) structure of the basic polymeric building block of compound **1** with three DMF molecules (red, blue and yellow species) and HDMA<sup>+</sup> organic cation (violet species), b) coordination sphere around Zn<sup>II</sup> ion in anionic MOF of **1** and c) trinuclear Zn<sub>3</sub> cluster unit which exists in anionic MOF of **4** (Zn = violet, O = red, N = blue, C = gray and H = white).

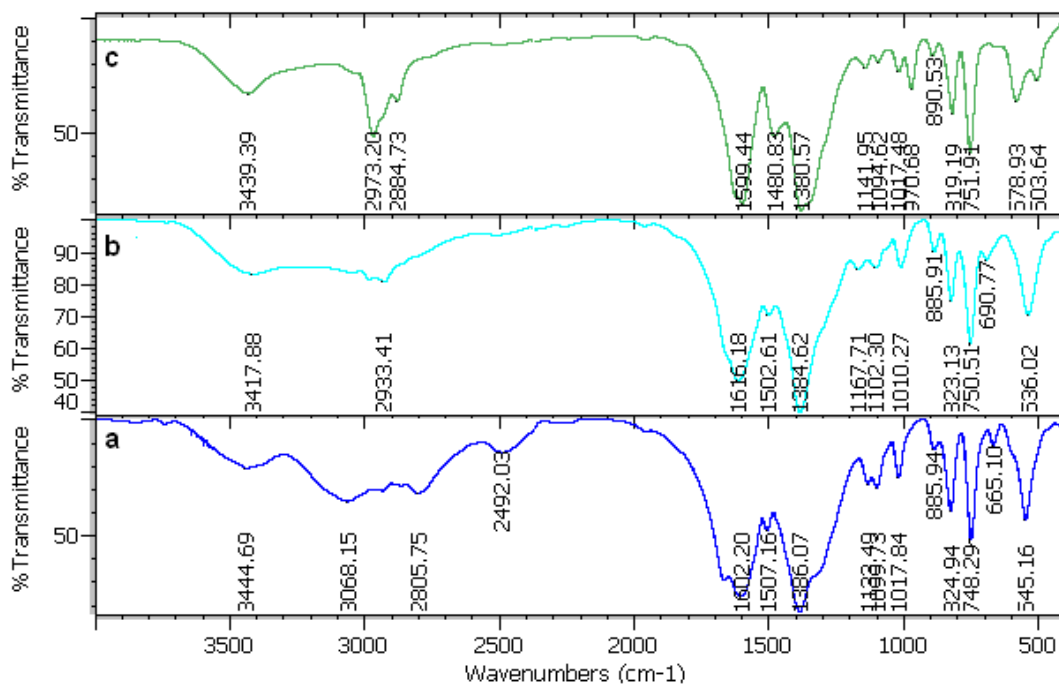

**Figure S3.** IR spectra of (a) colorless crystals of compound **1** prepared in the presence of terephthalodinitrile, (b) post-synthetic MOF material of **2** and (c) post-synthetic MOF material of **3**.

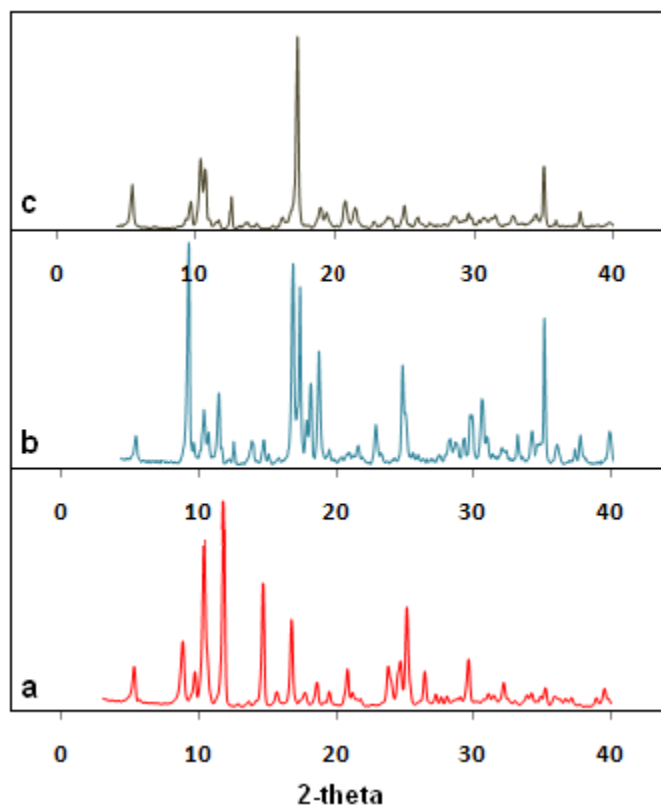

**Figure S4.** The XRD patterns of (a) colorless crystals of compound **1** prepared in the presence of terephthalodinitrile, (b) post-synthetic MOF material of **2** and (c) post-synthetic MOF material of **3**.

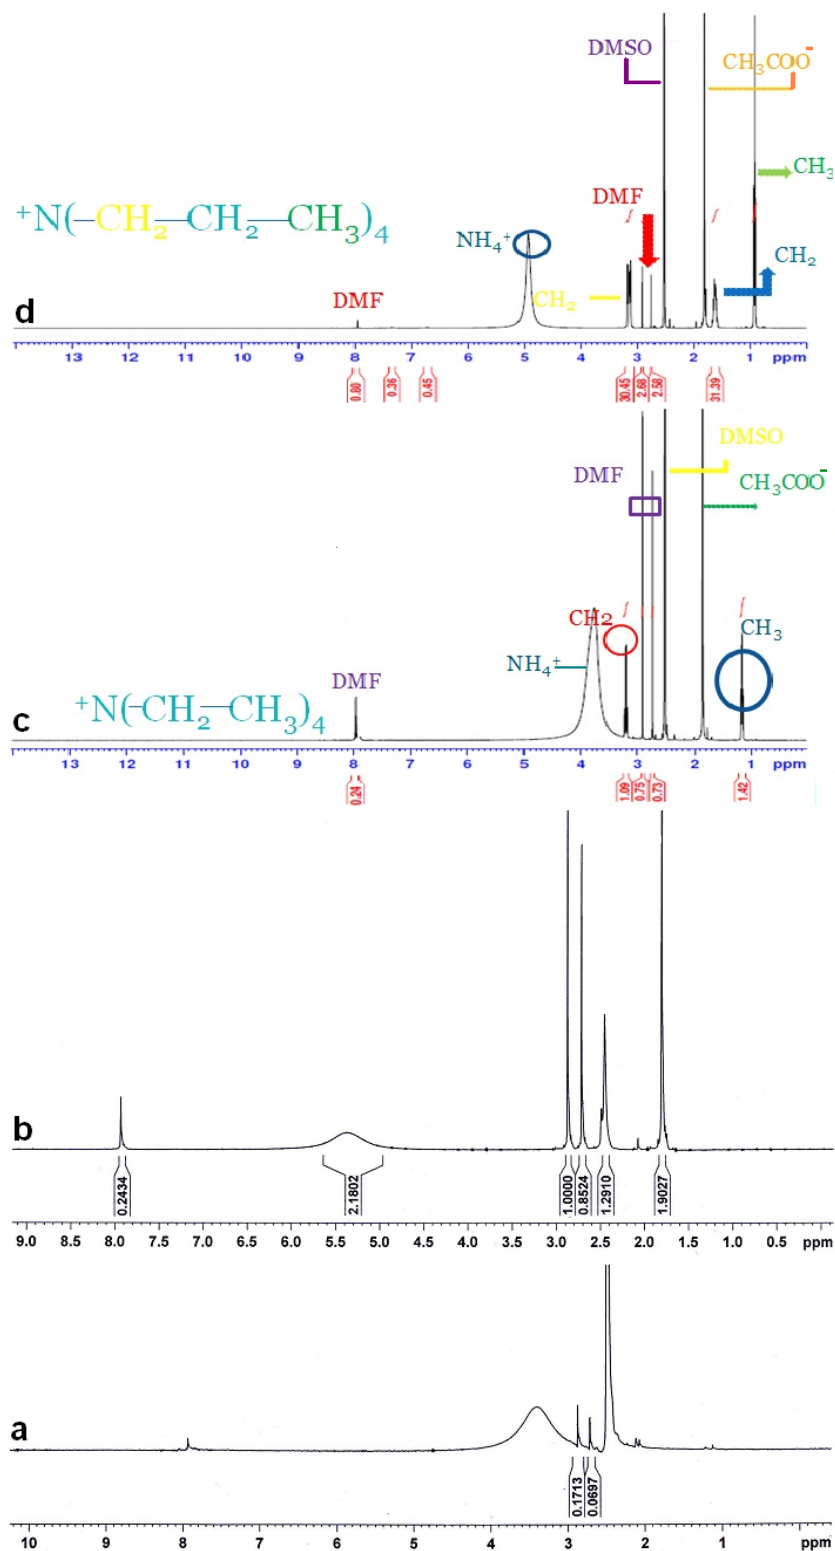

**Figure S5.** The  $^1\text{H-NMR}$  spectra of (a) compound **1**, (b) compound **1** after addition of 5 mg ammonium acetate to the tube, (c) compound **2** after addition of 5 mg ammonium acetate to the tube and (d) compound **3** after addition of 5 mg ammonium acetate to the tube.

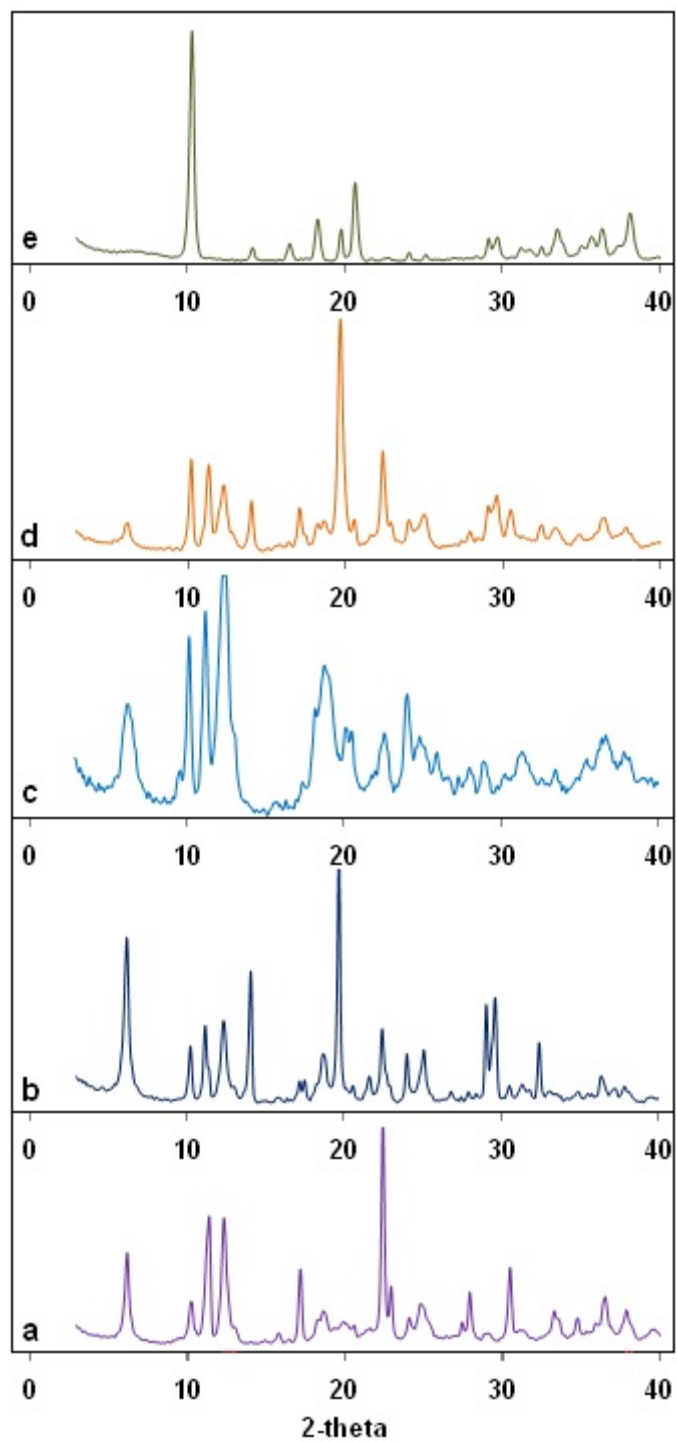

**Figure S6.** The XRD patterns of compound **3** samples which were immersed in (a) benzene, (b) toluene, (c) dichloromethane, (d) ethanol and (e) tetrahydrofuran (THF) after one week.

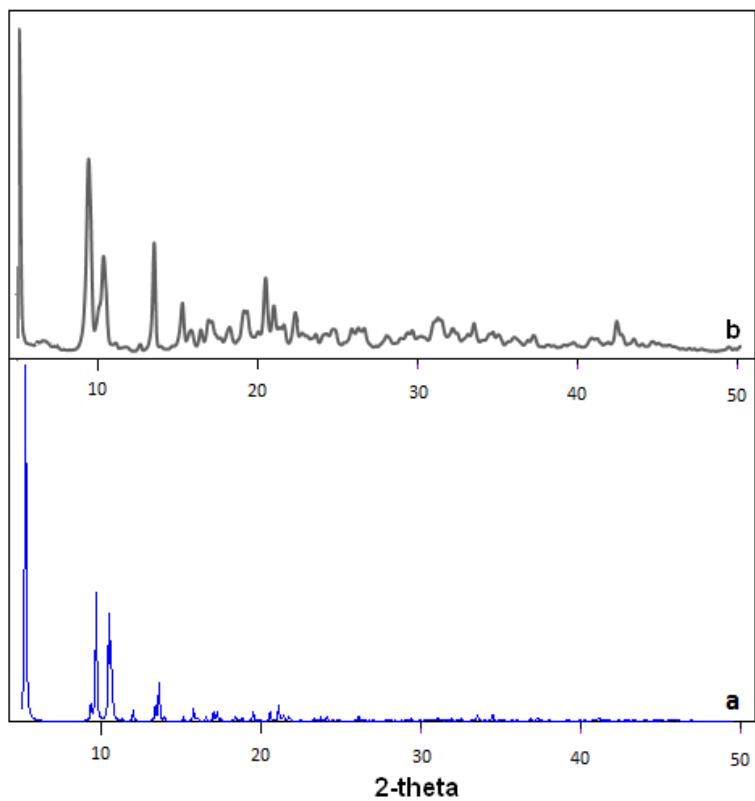

**Figure S7.** The XRD patterns of (a) simulated from single crystal X-ray data of compound **4** and (b) colorless crystals of compound **4** prepared in the presence of 4-bpdb (1,4-bis(4-pyridyl)-2,3-diaza-1,3-butadiene).



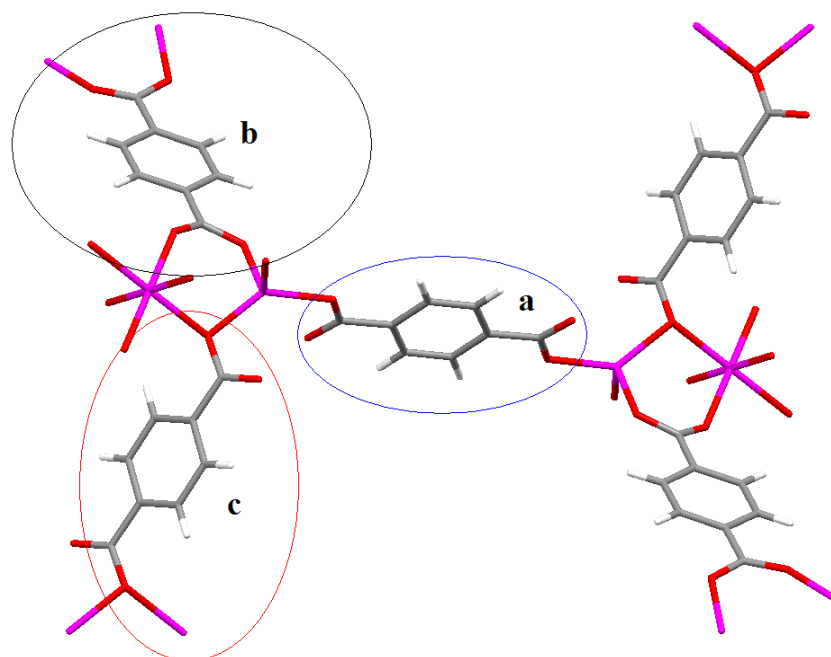

**Figure S8.** Showing three types of BDC<sup>2-</sup> anions with a)  $\mu_2$ , b)  $\mu_4$  and c)  $\mu_4$  coordination modes in anionic MOF of **4**, (Zn = violet, O = red, C = gray and H = white).

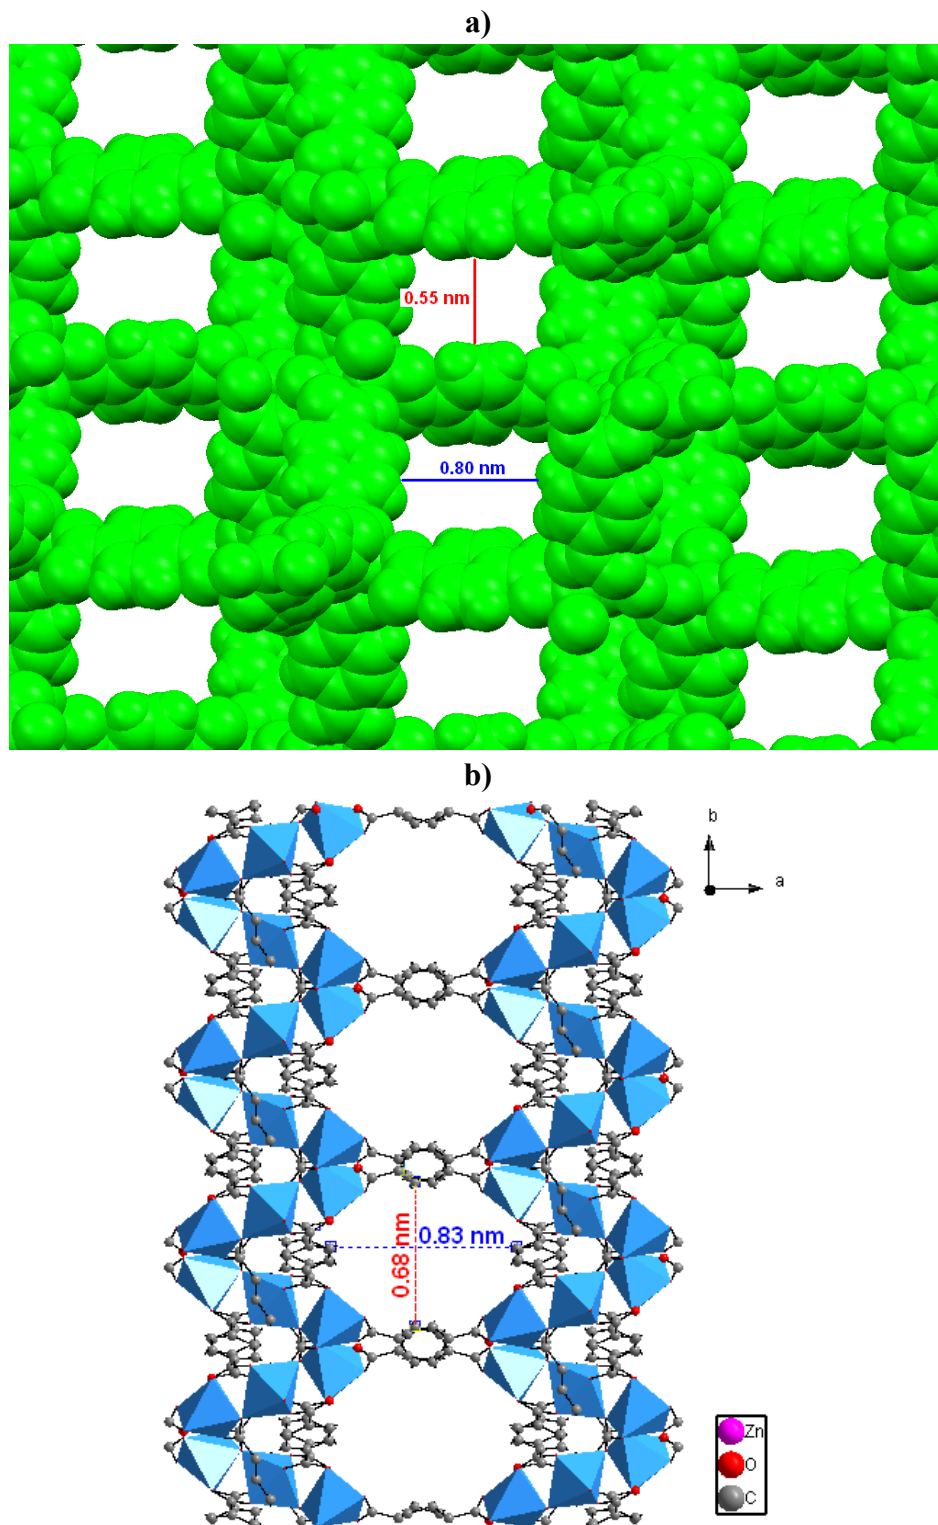

**Figure S9.** Showing the existence of one-dimensional channels along the crystallographic a) *b* axis and b) *c* axis in an anionic nano-porous MOF of 4.

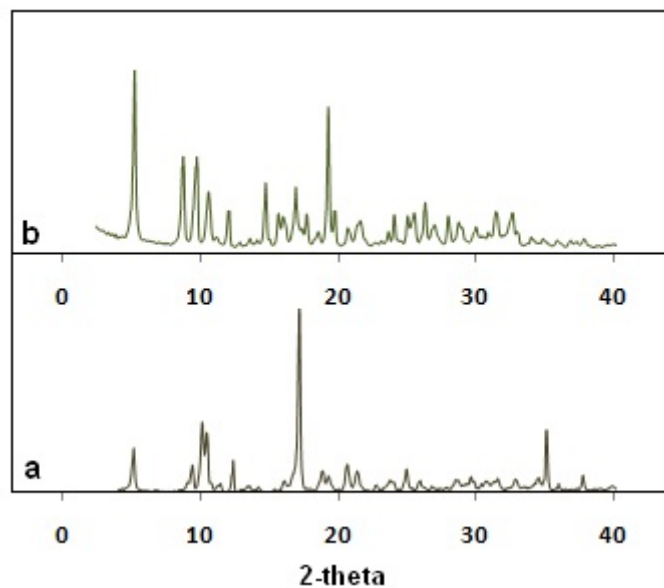

**Figure S10.** The XRD patterns of (a) colorless crystals of compound **3** prepared in the presence of terephthalodinitrile, (b) compound **3** after six successive runs.
